# Supplementary material for: Self-reported Costs of Endometriosis Patients in Germany
Source: PubMed Central journal article supplement — Geburtshilfe Frauenheilkd. 2024 Sep 5;84(12):1143–9. doi: 10.1055/a-2378-3468 (PMC11624002; doi:10.1055/a-2378-3468), 2024-09-05
Supplement: 10-1055-a-2378-3468_23832278.pdf [file 10-1055-a-2378-3468_23832278.pdf]

## Zusatzmaterial

Tab. S1: Übersicht der selbstberichteten direkten Kosten des Kostenblockes: Nichtmedikamentöse Therapie.

| Parameter                                              | Total      |                |                | GKV        |                |                | PKV       |                |                |
|--------------------------------------------------------|------------|----------------|----------------|------------|----------------|----------------|-----------|----------------|----------------|
|                                                        | N          | MW             | SD             | N          | MW             | SD             | N         | MW             | SD             |
| Ambulante ärztl. Versorgung [€]                        | 42         | 263,50         | 524,18         | 40         | 199,12         | 302,54         | 2         | 1530           | 2078,89        |
| Stationäre ärztl. Versorgung [€] STATION               | 104        | 245,78         | 996,22         | 101        | 137,14         | 192,76         | 3         | 3903,33        | 5347,06        |
| Schmerztherapie (amb./stat.) [€]                       | 21         | 198,57         | 272,93         | 21         | 198,57         | 272,93         | 0         | -              | -              |
| Kinderwunsch [€]                                       | 35         | 4227,14        | 5697,91        | 33         | 4446,97        | 5797,69        | 2         | 600            | 565,69         |
| <b>Summe direkte Kosten: Behandlungen (Fälle) [€]</b>  | <b>149</b> | <b>1266,48</b> | <b>3391,88</b> | <b>146</b> | <b>1183,12</b> | <b>3280,75</b> | <b>3</b>  | <b>5323,33</b> | <b>6769,35</b> |
| <b>Summe direkte Kosten: Behandlungen (Gesamt) [€]</b> | <b>250</b> | <b>754,82</b>  | <b>2688,12</b> | <b>235</b> | <b>735,05</b>  | <b>2645,81</b> | <b>15</b> | <b>1064,67</b> | <b>3377,01</b> |

Tab. S2: Übersicht der selbstberichteten direkten Kosten des Kostenblockes: Medikamentöse Therapie.

| Parameter                                                 | Total      |               |               | GKV        |               |               | PKV       |               |               |
|-----------------------------------------------------------|------------|---------------|---------------|------------|---------------|---------------|-----------|---------------|---------------|
|                                                           | N          | MW            | SD            | N          | MW            | SD            | N         | MW            | SD            |
| Hormonelle Therapie [€]                                   | 114        | 134,55        | 172,89        | 107        | 130,17        | 169,82        | 7         | 201,43        | 218,97        |
| Verschreibungspflichtige Medikamente [€]                  | 147        | 99,80         | 148,45        | 140        | 100,43        | 151,56        | 7         | 87,14         | 62,64         |
| Privatrezepte für Medikamente [€]                         | 109        | 240,28        | 374,77        | 103        | 249,18        | 383,68        | 6         | 87,5          | 31,58         |
| <b>Summe direkte Kosten: Med. Versorgung (Fälle) [€]</b>  | <b>211</b> | <b>266,40</b> | <b>350,22</b> | <b>201</b> | <b>266,94</b> | <b>356,51</b> | <b>10</b> | <b>255,5</b>  | <b>193,34</b> |
| <b>Summe direkte Kosten: Med. Versorgung (Gesamt) [€]</b> | <b>250</b> | <b>224,79</b> | <b>335,89</b> | <b>235</b> | <b>228,31</b> | <b>342,76</b> | <b>15</b> | <b>169,67</b> | <b>198,62</b> |

Tab. S3: Übersicht der selbstberichteten direkten Kosten des Kostenblockes: Hilfsmittel.

| Parameter                                                 | Total      |               |               | GKV        |               |               | PKV       |               |               |
|-----------------------------------------------------------|------------|---------------|---------------|------------|---------------|---------------|-----------|---------------|---------------|
|                                                           | N          | MW            | SD            | N          | MW            | SD            | N         | MW            | SD            |
| Medizinische Geräte [€]                                   | 125        | 119,18        | 111,90        | 119        | 121,07        | 114,03        | 6         | 81,67         | 43,55         |
| Bücher und Fachvorträge [€]                               | 111        | 78,27         | 83,18         | 103        | 79,54         | 85,79         | 8         | 61,88         | 34,01         |
| <b>Summe direkte Kosten: Med. Versorgung (Fälle) [€]</b>  | <b>211</b> | <b>266,40</b> | <b>350,22</b> | <b>201</b> | <b>266,94</b> | <b>356,51</b> | <b>10</b> | <b>255,5</b>  | <b>193,34</b> |
| <b>Summe direkte Kosten: Med. Versorgung (Gesamt) [€]</b> | <b>250</b> | <b>224,79</b> | <b>335,89</b> | <b>235</b> | <b>228,31</b> | <b>342,76</b> | <b>15</b> | <b>169,67</b> | <b>198,62</b> |

Tab. S4: Übersicht der selbstberichteten direkten Kosten des Kostenblockes: Heilmittel und Ergänzende Therapie.

| Parameter                                                          | Total |         |         | GKV |         |         | PKV |        |        |
|--------------------------------------------------------------------|-------|---------|---------|-----|---------|---------|-----|--------|--------|
|                                                                    | N     | MW      | SD      | N   | MW      | SD      | N   | MW     | SD     |
| Physiotherapie [€]                                                 | 84    | 201,96  | 249,28  | 80  | 192,31  | 228,59  | 4   | 395    | 539,54 |
| Physiotherapie [€]                                                 | 84    | 201,96  | 249,28  | 80  | 192,31  | 228,59  | 4   | 395    | 539,54 |
| Ergotherapie [€]                                                   | 5     | 222,00  | 274,44  | 5   | 222     | 274,44  | 0   | -      | -      |
| Osteopathie [€]                                                    | 107   | 362,57  | 324,13  | 103 | 367,43  | 328,83  | 4   | 237,5  | 118,43 |
| Entspannungsverfahren [€]                                          | 50    | 260,40  | 218,94  | 47  | 266,6   | 223,03  | 3   | 163,33 | 123,42 |
| Psychologische Verfahren [€]                                       | 13    | 361,15  | 573,43  | 13  | 361,15  | 573,43  | 0   | -      | -      |
| TCM [€]                                                            | 28    | 1699,29 | 4872,46 | 26  | 1799,23 | 5048,91 | 2   | 400    | 282,84 |
| Homöopathie [€]                                                    | 29    | 283,45  | 258,99  | 29  | 283,45  | 258,99  | 0   | -      | -      |
| Sonstige Therapien [€]                                             | 30    | 353,67  | 556,31  | 29  | 363,28  | 563,61  | 1   | 75     | -      |
| <b>Summe direkte Kosten:<br/>Ergänzende Therapien (Fälle) [€]</b>  | 250   | 522,66  | 1856,32 | 235 | 539,7   | 1910,6  | 15  | 255,73 | 439,71 |
| <b>Summe direkte Kosten:<br/>Ergänzende Therapien (Gesamt) [€]</b> | 250   | 522,66  | 1856,32 | 235 | 539,7   | 1910,6  | 15  | 255,73 | 439,71 |

Tab. S5: Übersicht der selbstberichteten direkten Kosten des Kostenblockes: Nicht medizinische direkte Kosten.

| Parameter                                                     | Total |        |        | GKV |        |        | PKV |        |       |
|---------------------------------------------------------------|-------|--------|--------|-----|--------|--------|-----|--------|-------|
|                                                               | N     | MW     | SD     | N   | MW     | SD     | N   | MW     | SD    |
| Fahrtkosten [€]                                               | 191   | 222,63 | 289,51 | 178 | 230,9  | 297,39 | 13  | 109,38 | 87,3  |
| <b>Summe direkte Kosten:<br/>Sonstige Kosten (Fälle) [€]</b>  | 191   | 222,63 | 289,51 | 178 | 230,9  | 297,39 | 13  | 109,38 | 87,3  |
| <b>Summe direkte Kosten:<br/>Sonstige Kosten (Gesamt) [€]</b> | 250   | 170,09 | 270,05 | 235 | 174,89 | 277,01 | 15  | 94,80  | 89,52 |

Tab. S6: Übersicht der selbstberichteten direkten Kosten des Kostenblockes: Ernährungstherapie.

| Parameter                                                               | Total |        |        | GKV |        |        | PKV |        |        |
|-------------------------------------------------------------------------|-------|--------|--------|-----|--------|--------|-----|--------|--------|
|                                                                         | N     | MW     | SD     | N   | MW     | SD     | N   | MW     | SD     |
| Ernährungsberatung [€]                                                  | 13    | 226,92 | 209,26 | 13  | 226,92 | 209,26 | 0   | -      | -      |
| Nahrungsergänzungsmittel [€]                                            | 157   | 293,46 | 321,43 | 149 | 300,42 | 327,06 | 8   | 163,75 | 143,32 |
| Weitere Ernährungsausgaben [€]                                          | 127   | 376,24 | 333,07 | 119 | 379,79 | 330,79 | 8   | 323,5  | 385,7  |
| <b>Summe direkte Kosten:<br/>Ernährungsbezogene Kosten (Fälle) [€]</b>  | 187   | 517,63 | 507,11 | 176 | 527,88 | 514,86 | 11  | 353,64 | 335,72 |
| <b>Summe direkte Kosten:<br/>Ernährungsbezogene Kosten (Gesamt) [€]</b> | 250   | 387,19 | 492,75 | 235 | 395,35 | 500,87 | 15  | 259,33 | 326,66 |

Tab. S7: Übersicht der selbstberichteten indirekten Kosten des Kostenblockes: Einkommensverluste.

| Parameter                                                              | Total |         |          | GKV |         |          | PKV |     |        |
|------------------------------------------------------------------------|-------|---------|----------|-----|---------|----------|-----|-----|--------|
|                                                                        | N     | MW      | SD       | N   | MW      | SD       | N   | MW  | SD     |
| Arbeitsunfähigkeit [€]                                                 | 49    | 3019,03 | 5278,53  | 48  | 3063,18 | 5325,24  | 1   | 900 | -      |
| Arbeitsreduzierung [€]                                                 | 43    | 4090,47 | 6027,74  | 43  | 4090,47 | 6027,74  | 0   | -   | -      |
| Erwerbsminderung [€]                                                   | 7     | 6885,71 | 8824,10  | 7   | 6885,71 | 8824,1   | 0   | -   | -      |
| Kündigung oder<br>Arbeitslosigkeit [€]                                 | 16    | 6231,58 | 11062,62 | 16  | 6231,58 | 11062,62 | 0   | -   | -      |
| <b>Summe indirekte Kosten:<br/>Einkommensverluste (Fälle)<br/>[€]</b>  | 90    | 5241,42 | 8327,76  | 89  | 5290,2  | 8362,01  | 1   | 900 | -      |
| <b>Summe indirekte Kosten:<br/>Einkommensverluste<br/>(Gesamt) [€]</b> | 250   | 1886,91 | 5580,63  | 235 | 2003,52 | 5736,63  | 15  | 60  | 232,38 |

Tab. S8: Übersicht der selbstberichteten indirekten Kosten des Kostenblockes: Sonstige indirekte Kosten.

| Parameter                                                | Total |         |         | GKV |         |         | PKV |        |        |
|----------------------------------------------------------|-------|---------|---------|-----|---------|---------|-----|--------|--------|
|                                                          | N     | MW      | SD      | N   | MW      | SD      | N   | MW     | SD     |
| Alltagsunterstützung [€]                                 | 15    | 1207,27 | 1181,51 | 14  | 1293,43 | 1176,19 | 1   | 1      | -      |
| Pflegekosten [€]                                         | 3     | 80,00   | 10,00   | 3   | 80      | 10      | 0   | -      | -      |
| Kosten durch<br>Folgeerkrankungen [€]                    | 105   | 433,10  | 877,50  | 100 | 440,46  | 896,74  | 5   | 286    | 298,71 |
| Weitere Kosten [€]                                       | 19    | 421,58  | 381,67  | 16  | 488,75  | 379,51  | 3   | 63,33  | 47,26  |
| <b>Summe indirekte Kosten:<br/>Sonstige (Fälle) [€]</b>  | 124   | 579,32  | 1004,43 | 117 | 600,12  | 1028,84 | 7   | 231,57 | 260,81 |
| <b>Summe indirekte Kosten:<br/>Sonstige (Gesamt) [€]</b> | 250   | 287,34  | 763,28  | 235 | 298,79  | 784,32  | 15  | 108,07 | 208,45 |

Tab. S9: Übersicht der selbstberichteten direkten und indirekten Kosten aller Kostenblöcke.

| Parameter                                                                   | Total |         |         | GKV |         |         | PKV |         |         |
|-----------------------------------------------------------------------------|-------|---------|---------|-----|---------|---------|-----|---------|---------|
|                                                                             | N     | MW      | SD      | N   | MW      | SD      | N   | MW      | SD      |
| <b>Summe direkte Kosten:<br/>Behandlungen (Gesamt) [€]</b>                  | 250   | 754,82  | 2688,12 | 235 | 735,05  | 2645,81 | 15  | 1064,67 | 3377,01 |
| <b>Summe direkte Kosten: Med.<br/>Versorgung (Gesamt) [€]</b>               | 250   | 224,79  | 335,89  | 235 | 228,31  | 342,76  | 15  | 169,67  | 198,62  |
| <b>Summe direkte Kosten:<br/>Hilfsmittel (Gesamt) [€]</b>                   | 250   | 104,36  | 165,12  | 235 | 103,64  | 160,77  | 15  | 115,67  | 229,76  |
| <b>Summe direkte Kosten:<br/>Ergänzende Therapien<br/>(Gesamt) [€]</b>      | 250   | 522,66  | 1856,32 | 235 | 539,7   | 1910,6  | 15  | 255,73  | 439,71  |
| <b>Summe direkte Kosten:<br/>Sonstige Kosten (Gesamt) [€]</b>               | 250   | 170,17  | 252,68  | 178 | 230,9   | 297,39  | 13  | 109,38  | 87,3    |
| <b>Summe direkte Kosten:<br/>Ernährungsbezogene Kosten<br/>(Gesamt) [€]</b> | 250   | 387,19  | 492,75  | 235 | 395,35  | 500,87  | 15  | 259,33  | 326,66  |
| <b>Summe indirekte Kosten:<br/>Einkommensverluste<br/>(Gesamt) [€]</b>      | 250   | 1886,91 | 5580,63 | 235 | 2003,52 | 5736,63 | 15  | 60      | 232,38  |
| <b>Summe indirekte Kosten:<br/>Sonstige (Gesamt) [€]</b>                    | 250   | 287,34  | 763,28  | 235 | 298,79  | 784,32  | 15  | 108,07  | 208,45  |

Abb. S1: Online-Fragebogen.

---

## Herzlich Willkommen!

Willkommen zur Umfrage zum Thema "Krankenkassenleistungen und Kosten bei Endometriose/Adenomyose".

Die Umfrage wird in zwei Teile aufgeteilt sein, im ersten Teil wird es Fragen zu Krankenkassenleistungen bei Endometriose/Adenomyose geben. Der zweite Teil der Umfrage befasst sich mit Kosten bei Endometriose/Adenomyose.

---

## Einwilligung

Die Richtlinien guter ethischer Forschung sehen vor, dass sich die Teilnehmer:innen an empirischen Studien explizit und nachvollziehbar mit der Teilnahme einverstanden erklären.

Deine Teilnahme an dieser Untersuchung ist freiwillig. Es steht dir zu jedem Zeitpunkt dieser Befragung frei, deine Teilnahme abubrechen, ohne dass dir daraus Nachteile entstehen. Du kannst die Teilnahme jederzeit und ohne Angabe von Gründen beenden.

Deine Daten sind selbstverständlich vertraulich, werden nur in anonymisierter Form ausgewertet und nicht an Dritte weitergegeben. Demografische Angaben wie Alter oder Geschlecht lassen keinen eindeutigen Schluss auf deine Person zu.

Falls du noch Fragen zu dieser Befragung haben solltest, findest du unten ein Impressum mit Kontaktdaten der Verantwortlichen.

## Einverständniserklärung

- Hiermit bestätige ich, dass ich mindestens 18 Jahre alt bin sowie die Einverständniserklärung gelesen und verstanden habe.
- Ich möchte nicht an der Studie teilnehmen.

## Demografie

Bevor die Umfrage startet, werden nun noch ein paar demografische Daten abgefragt.

### 1. Was ist dein Geschlecht?

Bitte wähle das Zutreffende aus.

- weiblich
- männlich
- divers

### 2. Wie alt bist du?

Bitte trage dein Alter in das Textfeld ein.

Jahre

### 3. Welchem Beruf gehst du nach?

Bitte wähle das Zutreffende aus.

- Ich gehe folgendem Beruf nach:
- Ich bin Schüler:in/Student:in.
- Ich gehe keinem Beruf/keiner Beschäftigung nach.

### 4. Wie hoch ist dein jährliches Haushaltsnettoeinkommen?

Bitte wähle das Zutreffende aus.

- unter 20.000 €
- 20.000-40.000 €
- 40.000-60.000 €
- 60.000-80.000 €
- 80.000-100.000 €
- über 100.000 €

### 5. Wie ist dein Familienstand?

Bitte wähle das Zutreffende aus.

- Ledig
- Feste Partnerschaft, getrennt lebend
- Feste Partnerschaft, zusammenlebend
- Geschieden
- Verwitwet
- Sonstiges

### 6. Hast du Kinder?

Falls ja, gib bitte an, wie viele Kinder du hast.

- Ja, ich habe  Kinder.
- Nein, ich habe keine Kinder.

## Teil 1: Krankenkassenleistungen bei Endometriose/Adenomyose

Der erste Teil der Umfrage befasst sich mit den Krankenkassenleistungen bei Endometriose/Adenomyose. Unser Ziel ist es, die Erfahrungen zu erfassen, die Betroffene mit ihren Krankenkassen machen.

### 7. Bei welcher Krankenkasse bist du versichert?

Bitte trage in das Textfeld ein, bei welcher Krankenkasse du versichert bist.

### 8. Welche Leistungen werden von deiner Krankenkasse übernommen (hinsichtlich Endometriose und/oder Adenomyose) und zu wie viel Prozent?

Bitte klicke die zutreffende/n Option/en an und trage den Prozentsatz in das Textfeld ein.

|                          |                                                           |                      |   |
|--------------------------|-----------------------------------------------------------|----------------------|---|
| <input type="checkbox"/> | Rezeptpflichtige Medikamente                              | <input type="text"/> | % |
| <input type="checkbox"/> | Physiotherapie                                            | <input type="text"/> | % |
| <input type="checkbox"/> | Kinderwunsch-Behandlungen                                 | <input type="text"/> | % |
| <input type="checkbox"/> | Entspannungsverfahren (z.B. Yoga)                         | <input type="text"/> | % |
| <input type="checkbox"/> | Medizinisches Cannabis                                    | <input type="text"/> | % |
| <input type="checkbox"/> | Hormonelle Therapie (z.B. Hormonspirale, Pille)           | <input type="text"/> | % |
| <input type="checkbox"/> | Digitale Gesundheitsanwendungen (z.B. Endo-App)           | <input type="text"/> | % |
| <input type="checkbox"/> | REHA und AHB                                              | <input type="text"/> | % |
| <input type="checkbox"/> | Ernährungsberatung                                        | <input type="text"/> | % |
| <input type="checkbox"/> | TENS-Gerät                                                | <input type="text"/> | % |
| <input type="checkbox"/> | Endometriose-Operationen                                  | <input type="text"/> | % |
| <input type="checkbox"/> | Schmerztherapie                                           | <input type="text"/> | % |
| <input type="checkbox"/> | Sonografien                                               | <input type="text"/> | % |
| <input type="checkbox"/> | moderne therapeutische Verfahren (z.B. MRgFUS-Behandlung) | <input type="text"/> | % |
| <input type="checkbox"/> | Alternativmedizin (z.B. Osteopathie, TCM, Homöopathie)    | <input type="text"/> | % |
| <input type="checkbox"/> | keine Leistungen werden übernommen                        |                      |   |
| <input type="checkbox"/> | Anmerkungen                                               | <input type="text"/> |   |

**9. Welche Leistungen wurden von deiner Krankenkasse abgelehnt?**

Bitte wähle die zutreffende/n Option/en aus.

- Rezeptpflichtige Medikamente
- Physiotherapie
- Kinderwunsch-Behandlungen
- Entspannungsverfahren (z.B. Yoga)
- Medizinisches Cannabis
- Hormonelle Therapie (z.B. Hormonspirale, Pille)
- Digitale Gesundheitsanwendungen (z.B. Endo-App)
- Reha und AHB
- Ernährungsberatung
- TENS-Gerät
- Endometriose-Operationen
- Schmerztherapie
- Sonografien
- moderne therapeutische Verfahren (z.B. MRgFUS-Behandlung)
- Alternativmedizin (z.B. Osteopathie, TCM, Homöopathie)
- keine Leistungen wurden abgelehnt

**10. Hast du eine App-auf-Rezept (Digitale Gesundheitsanwendungen, z.B. Endo-App) verschrieben bekommen?**

- ja
- nein

**11. Wie zufrieden bist du insgesamt mit deiner Krankenkasse?**

Bitte wähle den Grad der Zufriedenheit aus.

überhaupt nicht zufrieden    nicht zufrieden    in Ordnung    zufrieden    sehr zufrieden

Zufriedenheit mit der Krankenkasse:

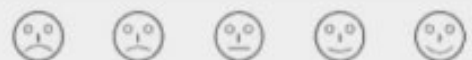**12. Möchtest du noch etwas zu deinen Erfahrungen mit deiner Krankenkasse mitteilen?**

Bitte trage deine Anmerkungen in das Textfeld ein.

## Teil 2: Kosten durch Endometriose/Adenomyose

Die folgenden Fragen beschäftigen sich mit den Kosten, die für Betroffene von Endometriose/Adenomyose entstehen. Unser Ziel ist es, sowohl die finanzielle als auch die immaterielle Belastung zu untersuchen, die Betroffene durch ihre Erkrankung tragen müssen.

Welche Kosten hattest du durch deine Endometriose/ Adenomyose in den letzten 12 Monaten in folgenden Bereichen? Bitte versuche deine Kosten ungefähr zu schätzen:

### 1. Welche Kosten hattest du durch deine Endometriose/Adenomyose in den letzten 12 Monaten im Bereich Behandlungen?

Bitte wähle die zutreffende/n Option/en aus und trage die Kosten in das Textfeld ein.

Ambulante Behandlungen: Kosten für ambulante Arztbesuche, Behandlungen oder Untersuchungen, die nicht von deiner Krankenkasse übernommen wurden, z.B. Sonografien oder MRgFUS-Behandlungen

€

Stationäre Behandlungen: Zuzahlungen, Selbstzahlerleistungen und Kosten, die dir durch Krankenhaus- und Anschlussheilbehandlung/Reha-Aufenthalte entstanden sind

€

Kosten für Schmerztherapie (ambulant oder stationär)  €

Kosten für Kinderwunsch-Behandlungen  €

Ich hatte keine Kosten im Bereich Behandlungen.

### 2. Welche Kosten hattest du durch deine Endometriose/Adenomyose in den letzten 12 Monaten im Bereich ergänzende Therapien (Zuzahlungen, Selbstzahlerleistungen)?

Bitte wähle die zutreffende/n Option/en aus und trage die Kosten in das Textfeld ein.

Physiotherapie  €

Ergotherapie  €

Osteopathie  €

Entspannungsverfahren (z.B. Yoga)  €

Psychotherapie/ Psychologische Beratung  €

TCM  €

Homöopathie  €

Sonstige  €

Ich hatte keine Kosten im Bereich ergänzende Therapien.

### 3. Welche Kosten hattest du durch deine Endometriose/ Adenomyose in den letzten 12 Monaten im Bereich Verlust des Einkommens?

Bitte wähle die zutreffende/n Option/en aus und trage die Kosten in das Textfeld ein.

Einkommensverluste durch Arbeitsunfähigkeitszeiten/ Krankengeldbezug  €

Krankheitsbedingte Arbeitszeitreduzierung  €

Erwerbsminderung  €

Kündigungen oder Arbeitslosigkeit  €

Ich hatte keinen Verlust des Einkommens.



**4. Welche Kosten hattest du durch deine Endometriose/Adenomyose in den letzten 12 Monaten im Bereich Hilfsmittel?**

Bitte wähle die zutreffende/n Option/en aus und trage die Kosten in das Textfeld ein.

- Kosten für spezielle medizinische Geräte, wie zum Beispiel TENS-Geräte, Wärmepads, Akkupressurmatten oder Gehhilfen  €
- Kosten für Bücher oder Vorträge zum Thema Endometriose/Adenomyose  €
- Kosten für Digitale Gesundheitsanwendungen (z.B. Endo-App)  €
- Ich hatte keine Kosten im Bereich Hilfsmittel.

**5. Welche Kosten hattest du durch deine Endometriose/ Adenomyose in den letzten 12 Monaten im Bereich Pflegekosten (Kosten für häusliche Pflege oder Pflegedienste)?**

Bitte trage den Betrag ggf. in das Textfeld ein.

- Ich hatte folgende Kosten:  €
- Ich hatte keine Kosten im Bereich Pflege.

**6. Welche Kosten hattest du durch deine Endometriose/Adenomyose in den letzten 12 Monaten im Bereich Medikamente?**

Bitte wähle die zutreffende/n Option/en aus und trage die Kosten in das Textfeld ein.

- Hormonelle Therapie (z.B. Hormonspirale, Pille)  €
- Eigenanteil für andere verschreibungspflichtige Medikamente z.B. Schmerzmittel  €
- Kosten für Privatrezepte, z.B. Medizinisches Cannabis oder Rezepte für nicht verschreibungspflichtige Arzneimittel sowie rezeptfreie Medikamente  €
- Ich hatte keine Kosten im Bereich Medikamente.

**7. Welche Kosten hattest du durch deine Endometriose/ Adenomyose in den letzten 12 Monaten im Bereich Ernährung?**

Bitte trage den Betrag in das Textfeld ein.

- Ernährungsberatung  €
- Kosten für Nahrungsergänzungsmittel  €
- Mehr Kosten aufgrund von einer speziellen Ernährungsweise oder speziellen Lebensmitteln (z.B. glutenfreies Mehl, Tees)  €
- Ich hatte keine Kosten im Bereich Ernährung.

**8. Welche Kosten hattest du durch deine Endometriose/ Adenomyose in den letzten 12 Monaten im Bereich Kosten für Folgeerkrankungen oder Beschwerden der Endometriose/ Adenomyose, z.B. Fatigue, Reizdarm?**

Bitte trage den Betrag ggf. in das Textfeld ein.

- Ich hatte folgende Kosten:  €
- Ich hatte keine Kosten für Folgeerkrankungen oder Beschwerden.

**9. Welche Kosten hattest du durch deine Endometriose/ Adenomyose in den letzten 12 Monaten im Bereich Alltagsunterstützung (z.B. Haushaltshilfe oder Kinderbetreuung)?**

Bitte trage den Betrag ggf. in das Textfeld ein.

- Ich hatte folgende Kosten:  €
- Ich hatte keine Kosten im Bereich Alltagsunterstützung.

**10. Welche Kosten hattest du durch deine Endometriose/ Adenomyose in den letzten 12 Monaten im Bereich Fahrten (Fahrtkosten durch Arztbesuche oder Krankenhausbesuche, zum Beispiel für Benzin, Parkgebühren oder öffentliche Verkehrsmittel)?**

Bitte trage den Betrag in das Textfeld ein.

- Ich hatte folgende Kosten:  €
- Ich hatte keine Kosten im Bereich Fahrten.

**11. Welche weiteren Kostenfaktoren bzgl. deiner Endometriose/Adenomyose gab es in den letzten 12 Monaten?**

Bitte gib ggf. an, welche Kosten (in welcher Höhe) auf dich zugekommen sind.

- Ich hatte Kosten in folgenden Bereichen (Höhe der Kosten):
- Ich hatte keine weiteren Kosten.

**12. Ich benötige eine/ mehrere der genannten Maßnahmen, aber mir fehlt das Geld dafür.**

Bitte kreuze das Zutreffende an.

- trifft nicht zu
- trifft eher nicht zu
- teils-teils
- trifft eher zu
- trifft zu

Im folgenden Abschnitt werden dir Aussagen zu immateriellen Kosten durch deine Endometriose/Adenomyose präsentiert. Deine Aufgabe ist es einzuschätzen, inwieweit diese Aussagen auf dich zutreffen.

**1. Meine Endometriose/ Adenomyose kostet mich viel Zeit, zum Beispiel für Arzttermine, Informationssuche oder die benötigten Ruhezeiten.**

Bitte kreuze das Zutreffende an.

- trifft nicht zu       trifft eher nicht zu       teils-teils       trifft eher zu       trifft zu

**2. Durch meine Endometriose/ Adenomyose bin ich in meiner Leistungsfähigkeit, Effektivität und Produktivität eingeschränkt**

Bitte kreuze das Zutreffende an.

- trifft nicht zu       trifft eher nicht zu       teils-teils       trifft eher zu       trifft zu

**3. Durch meine Endometriose/Adenomyose ist meine Lebensqualität eingeschränkt.**

Bitte kreuze das Zutreffende an.

- trifft nicht zu       trifft eher nicht zu       teils-teils       trifft eher zu       trifft zu

**4. Meine Endometriose/ Adenomyose belastet mich emotional.**

Bitte kreuze das Zutreffende an.

- trifft nicht zu       trifft eher nicht zu       teils-teils       trifft eher zu       trifft zu

**5. Durch meine Endometriose/ Adenomyose habe ich weniger Chancen im Leben als andere.**

Bitte kreuze das Zutreffende an.

- trifft nicht zu       trifft eher nicht zu       teils-teils       trifft eher zu       trifft zu

---

Im folgenden Abschnitt werden dir Aussagen zu deinem sozialen Umfeld präsentiert. Deine Aufgabe ist es einzuschätzen, inwieweit diese Aussagen auf dich bzw. dein soziales Umfeld zutreffen.

**1. Durch meine Endometriose/ Adenomyose bin ich auf andere Menschen angewiesen.**

Bitte kreuze das Zutreffende an.

trifft nicht zu       trifft eher nicht zu       teils-teils       trifft eher zu       trifft zu

**2. Meine Endometriose/ Adenomyose belastet mein soziales Umfeld emotional.**

Bitte kreuze das Zutreffende an.

trifft nicht zu       trifft eher nicht zu       teils-teils       trifft eher zu       trifft zu

**3. Durch die Endometriose/ Adenomyose muss mich mein soziales Umfeld bei meinen alltäglichen Aufgaben unterstützen.**

Bitte kreuze das Zutreffende an.

trifft nicht zu       trifft eher nicht zu       teils-teils       trifft eher zu       trifft zu

**4. Es kostet mein soziales Umfeld Zeit, mich zu unterstützen.**

Bitte kreuze das Zutreffende an.

trifft nicht zu       trifft eher nicht zu       teils-teils       trifft eher zu       trifft zu

---

## Vielen Dank für deine Teilnahme!

Wir möchten uns ganz herzlich für deine Mithilfe bedanken.

Deine Antworten wurden gespeichert, du kannst das Browser-Fenster nun schließen.

---

Endo Health GmbH | Theaterstrasse 56 | 09111 Chemnitz | Handelsregister: HRB 33447 |  
Registergericht: Amtsgericht Chemnitz  
Ärztlicher Ansprechpartner: Dr. med. Nadine Rohloff  
Datenschutzbeauftragter: Markus Rothenhöfer (CISA)
